# Supplementary material for: Development and Validation of a Multiplex Reverse Transcription PCR Assay for Simultaneous Detection of Three Papaya Viruses
Source: Viruses. 2014 Oct 21;6(10):3893–906. doi: 10.3390/v6103893 (PMC4213569; doi:10.3390/v6103893)
Supplement: Supplementary File 1 [file viruses-06-03893-s001.pdf]

# Supplementary Materials

## Development and Validation of a Multiplex Reverse Transcription PCR Assay for Simultaneous Detection of Three Papaya Viruses

Decai Tuo, Wentao Shen, Yong Yang, Pu Yan, Xiaoying Li and Peng Zhou

**Table S1.** Comparison of the detection efficiency for PRSV, PLDMV, and PapMV in 341 field samples by uniplex RT-PCR and multiplex RT-PCR.

| Virus | No. of field samples | uniplex RT-PCR |                 | multiplex RT-PCR |                 | Co-efficiency rate % |
|-------|----------------------|----------------|-----------------|------------------|-----------------|----------------------|
|       |                      | Positive no.   | Positive rate % | Positive no.     | Positive rate % |                      |
| PRSV  | 341                  | 245            | 71.8            | 245              | 71.8            | 100                  |
| PLDMV | 341                  | 152            | 44.6            | 152              | 44.6            | 100                  |
| PapMV | 341                  | 3              | 0.9             | 3                | 0.9             | 100                  |
